# Supplementary material
Source: publisher figshare collection journal article supplement (https://acs.figshare.com/ndownloader/files/5467409)
Supplement: Supplementary file 1 [file 5467409]

## Supporting Information

# Insights on Foam Transport from a Texture-Implicit Local-Equilibrium Model with an Improved Parameter Estimation Algorithm

*Yongchao Zeng<sup>†</sup>, Aarthi Muthuswamy<sup>†</sup>, Kun Ma<sup>†‡</sup>, Le Wang<sup>†</sup>, Rouhi Farajzadeh<sup>‡⊥</sup>, Maura Puerto<sup>†</sup>, Sebastien Vincent-Bonnieu<sup>‡</sup>, Ali Akbar Eftekhari<sup>⊥</sup>, Ying Wang<sup>†</sup>, Chang Da<sup>†</sup>, Jeffrey C. Joyce<sup>†</sup>, Sibani L. Biswal<sup>†\*</sup>, and George J. Hirasaki<sup>†\*</sup>*

<sup>†</sup>Rice University, 6100 Main St., MS-362, Department of Chemical and Biomolecular Engineering, Houston, TX, 77005 USA.

<sup>‡</sup>Shell Global Solutions International, 2288 GS Rijswijk, the Netherlands

<sup>⊥</sup>Delft University of Technology, Delft, 2628 CN, the Netherlands

<sup>‡</sup> Current address: Total E&P Research and Technology USA, LLC, 1201 Louisiana Street, Houston, TX, 77002 USA

\* To whom correspondence should be addressed: email: [biswal@rice.edu](mailto:biswal@rice.edu), [gjh@rice.edu](mailto:gjh@rice.edu)

Table S1: Relative permeability data of Bentheimer sandstone<sup>41,46</sup>

| Parameter  | Bentheimer sandstone |
|------------|----------------------|
| $k_{rw}^o$ | 0.22                 |
| $k_{rg}^o$ | 0.94                 |
| $S_{wc}$   | 0.10                 |
| $S_{gr}$   | 0.05                 |
| $n_w$      | 4.00                 |
| $n_g$      | 1.80                 |

Derivation for Equation 13 and Equation 14:

According to Darcy's law, the superficial velocity for gas and liquid phases can be expressed as:

$$u_g = -\frac{k_{rock} \cdot k_{rg}^f}{\mu_g} \nabla p = -\frac{k_{rock} \cdot k_{rg}^{nf} \cdot FM}{\mu_g} \nabla p$$

Equation S1

$$u_w = -\frac{k_{rock} \cdot k_{rw}}{\mu_w} \nabla p$$

Equation S2

According to the definition of apparent viscosity of foam in Equation 1, the  $-k_{rock} \nabla p$  term can be expressed as:

$$-k_{rock} \nabla p = \mu_{app} \times (u_g + u_w)$$

Equation S3

Substitute Equation S3 into Equation S2, the relative permeability to aqueous phase can be solved as:

$$k_{rw} = \frac{\mu_w \times u_w (1 - f_g)}{\mu_{app} \times (u_w + u_g)} = \frac{\mu_w \times (1 - f_g)}{\mu_{app}} \quad \text{Equation S4}$$

Further substitute Equation S4 into Equation 11 and water saturation  $S_w$  can be solved for as in Equation 13.

In addition,  $k_{rg}^{nf}$  can be calculated from Equation 11 as:

$$k_{rg}^{nf} = k_{rg}^o \times \left( \frac{S_g - S_{gr}}{1 - S_{wc} - S_{gr}} \right)^{n_g} = k_{rg}^o \times \left( \frac{1 - S_w - S_{gr}}{1 - S_{wc} - S_{gr}} \right)^{n_g} \quad \text{Equation S5}$$

Plug Equation S3 and Equation S5 into Equation S1,  $FM$  can be solved for accordingly as shown in Equation 14.
